# Supplementary material
Source: PubMed Central journal article supplement (PMC4053506)
Supplement: NIHMS576713-supplement-Supplemental_Material.pdf [file NIHMS576713-supplement-Supplemental_Material.pdf]

## **SUPPLEMENTAL MATERIAL**

**Supplemental Table 1.** Primers used in the present study.

| <b>Gene</b>   | <b>Forward primer (5' -3' )</b>   | <b>Reverse primer (5' -3' )</b>    |
|---------------|-----------------------------------|------------------------------------|
| <b>LDLR</b>   | <b>CAGACTGCAAGGACAAGTCA</b>       | <b>GAG CCA TCT GCA CAC TGG AA</b>  |
| <b>VLDLR</b>  | <b>CCACAGCAGTATCAGAAGTC</b>       | <b>GCCATCACTAAGAGC AAGAG</b>       |
| <b>LPL</b>    | <b>AGTGTTTGTGAAATGCCATGA CA</b>   | <b>CGGATGCTTTCTTCTCTTGTTG</b>      |
| <b>APOA1</b>  | <b>GTGGCTCTGGTCTTCCTGAC</b>       | <b>ACGGTTGAACCCAGAGTGTC</b>        |
| <b>CD36</b>   | <b>GCC AAG CTA TTG CGA CAT GA</b> | <b>AGA ATC TCA ATG TCC GAG ACT</b> |
| <b>SREBP1</b> | <b>CCG TGG GCT GAG GAA GGA</b>    | <b>TGT GTA CTT GCC CAT GGC A</b>   |
| <b>SREBP2</b> | <b>CATCCCTTGGGCCAGAAGTT</b>       | <b>TCCTTGGCTGCTGACTTGATC</b>       |
| <b>Abca1</b>  | <b>AACAGTTTGTGGCCCTTTTG</b>       | <b>AGTTCCAGGCTGGGGTACTT</b>        |
| <b>HMGR</b>   | <b>TCTGGCAGTCAGTGGGAACTATT</b>    | <b>CCTCGTCCTTCGATCCAATTT</b>       |
| <b>CYP7A1</b> | <b>CAGTGAAGGTCATGCTGGAG</b>       | <b>CGCAATGAAGAAGGTGACAA</b>        |
| <b>SR-BI</b>  | <b>TCCCTCATCAAGCAGCAGGT</b>       | <b>TTCCACATCCCGAAGGACA</b>         |

## Supplemental Figure 1.

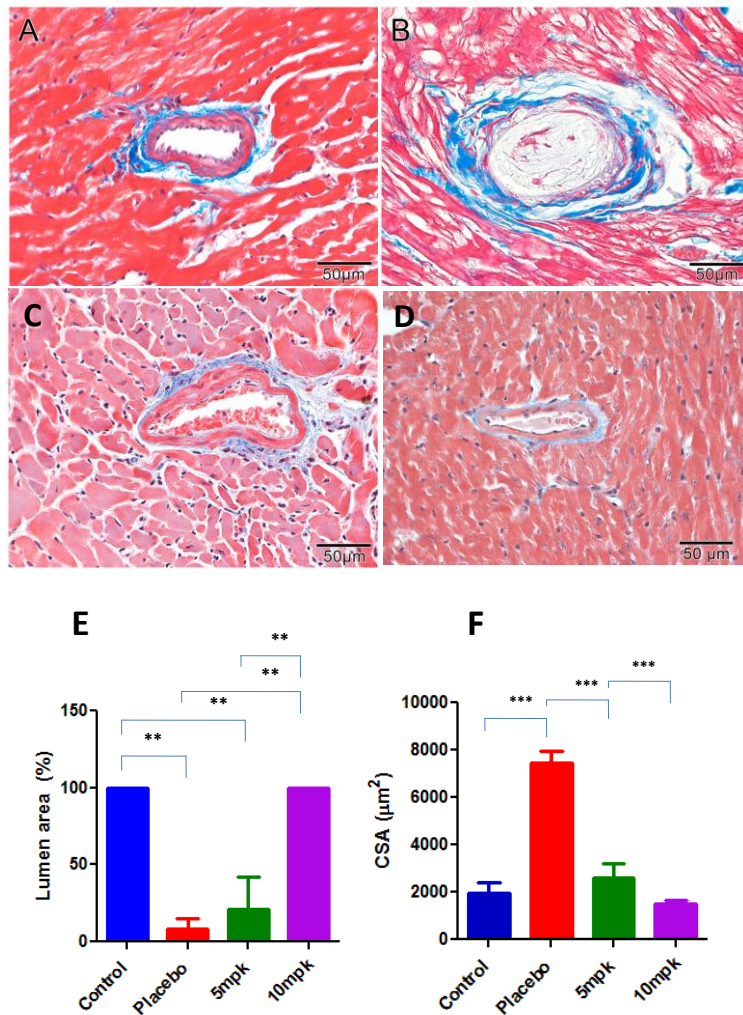

**Supplemental Figure 1.** Histopathological analysis showing Masson's Trichrome stained left coronary artery (LCA) of control ApoE<sup>-/-</sup> mouse on a chow diet (A), Apo E<sup>-/-</sup> on high fat high cholesterol (HFHC) diet plus vehicle (Placebo) (B), Apo E<sup>-/-</sup> on HFHC diet plus treatment with 5 (C) and 10 mpk of D-DPMP (D) respectively. Quantification of the cross sectional area of LCA (E). The placebo mice (E) show a significant increase in the cross sectional area (CSA), loss of smooth muscle cells, perivascular fibrosis, damaged wall, thrombosis and occlusion as compared to control and treated mice. The 5 and 10 mpk of D-DPMP treated mice show a dose dependent decline in cross sectional area and are not significantly different to control mice.
